# Supplementary material for: Selective electrochemical detection of dopamine in the presence of uric acid and ascorbic acid based on a composite film modified electrode
Source: Royal Society of Chemistry journal article supplement (doi:10.1039/c6ra09819c), 2016-01-01
Supplement: c6ra09819c1.pdf [file c6ra09819c1.pdf]

Supplemental Material for:

**Selective electrochemical detection of dopamine in the presence of uric acid and ascorbic acid based on composite film modified electrode**

Li Zhang<sup>a</sup>, Li Ning<sup>a</sup>, Shaobin Li<sup>b</sup>, Haijun Pang<sup>a</sup>, Zhuanfang Zhang<sup>a,b</sup>, Huiyuan Ma<sup>a\*</sup>,  
Hong Yan<sup>a\*</sup>

**Table of contents:**

1. **Fig. S1** TEM image of CuO nanoparticles.
2. **Fig. S2** TEM image of palladium nanoparticles.
3. **Fig. S3** XPS spectra of W 4f (a), V 2p (b), Cu 2p (c), Pd 3d (d), C 1s (e) and N 1s (f) of the {PEI/[(P<sub>2</sub>W<sub>17</sub>V-CuO)/(CS-Pd)]<sub>7</sub>/(P<sub>2</sub>W<sub>17</sub>V-CuO)} composite film.
4. **Fig. S4** Amperometric response of the {PEI/[(P<sub>2</sub>W<sub>17</sub>V-CuO)/(CS-Pd)]<sub>7</sub>/(P<sub>2</sub>W<sub>17</sub>V-CuO)} composite film modified electrode in the presence of 0.01 mM DA containing 1 mM uric acid (a), 1 mM ascorbic acid (b), 1 mM L-tryptophan (c), 1 mM L(+)-glutamic acid (d), 1 mM NADH (e), 1 mM folic acid (f), 10 mM NaCl (g), 10 mM KCl (h), 10 mM CaCl<sub>2</sub> (i) and 10 mM NO<sub>2</sub><sup>-</sup> (j) in 0.2 M PBS (pH 7.0); applied potential = 0.73 V (Ag/AgCl).
5. **Fig. S5** Cyclic voltammograms of the {PEI/[(P<sub>2</sub>W<sub>17</sub>V-CuO)/(CS-Pd)]<sub>7</sub>/(P<sub>2</sub>W<sub>17</sub>V-CuO)} composite film curves for 100 cycles in 0.2 M PBS (pH 7.0). Scan rate: 50 mV s<sup>-1</sup>.
6. **Fig. S6** The amperometric responses of the {PEI/[(P<sub>2</sub>W<sub>17</sub>V-CuO)/(CS-Pd)]<sub>7</sub>/(P<sub>2</sub>W<sub>17</sub>V-CuO)} composite film to 0.05 mM DA in 30 days in 0.2 M PBS (pH 7.0).

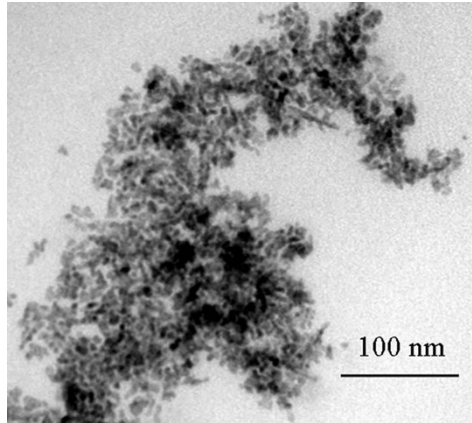

Fig. S1 TEM images of CuO nanoparticles.

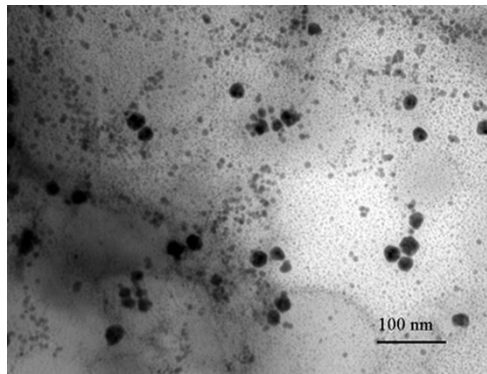

Fig. S2 TEM images of palladium nanoparticles.

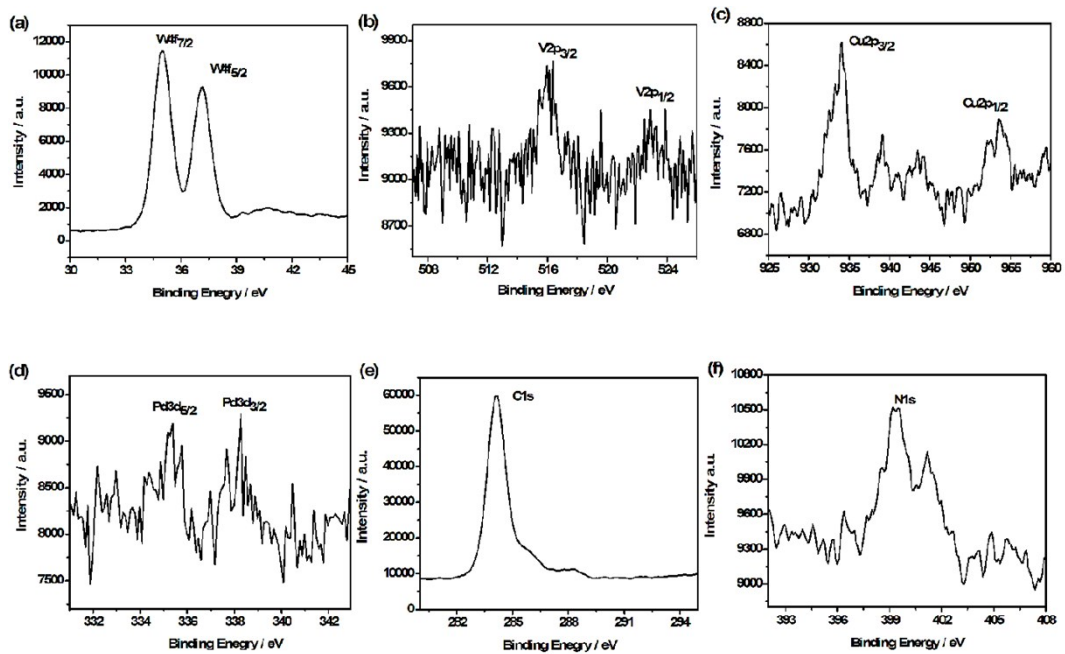

Fig. S3 XPS spectra of W 4f (a), V 2p (b), Cu 2p (c), Pd 3d (d), C 1s (e) and N 1s (f) of the  $\{PEI/[(P_2W_{17}V-CuO)/(CS-Pd)]_7/(P_2W_{17}V-CuO)\}$  composite film.

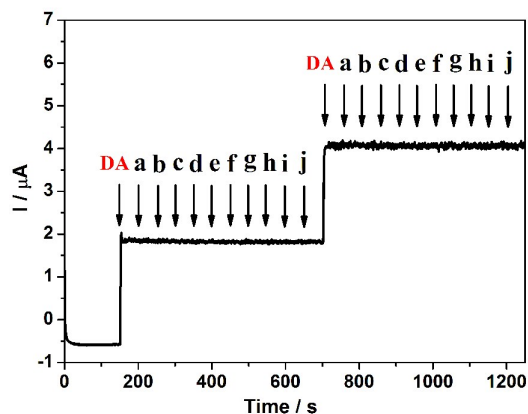

**Fig. S4** Amperometric response of the  $\{PEI/[(P_2W_{17}V-CuO)/(CS-Pd)]_7/(P_2W_{17}V-CuO)\}$  composite film modified electrode in the presence of 0.01 mM DA containing 1 mM uric acid (a), 1 mM ascorbic acid (b), 1 mM L-tryptophan (c), 1 mM L(+)-glutamic acid (d), 1 mM NADH (e), 1 mM folic acid (f), 10 mM NaCl (g), 10 mM KCl (h), 10 mM  $CaCl_2$  (i) and 10 mM  $NO_2^-$  (j) in 0.2 M PBS (pH 7.0); applied potential = 0.73 V (Ag/AgCl).

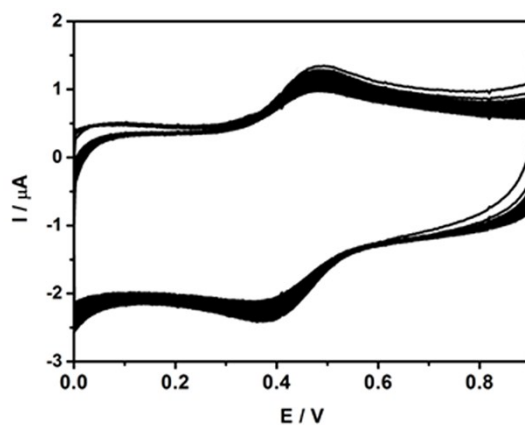

**Fig. S5** Cyclic voltammograms of the  $\{PEI/[(P_2W_{17}V-CuO)/(CS-Pd)]_7/(P_2W_{17}V-CuO)\}$  composite film curves for 100 cycles in 0.2 M PBS (pH 7.0). Scan rate:  $50 \text{ mV s}^{-1}$ .

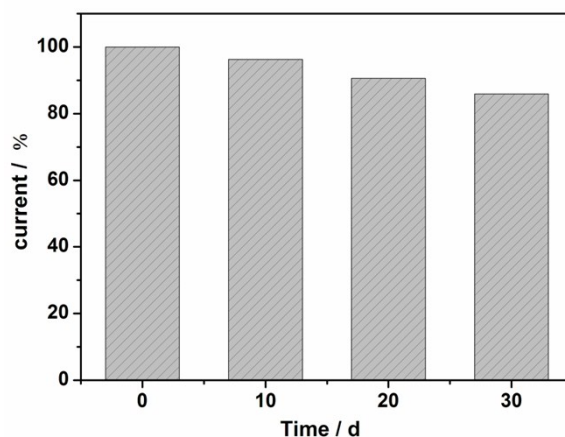

**Fig. S6** The amperometric responses of the  $\{PEI/[(P_2W_{17}V-CuO)/(CS-Pd)]_7/(P_2W_{17}V-CuO)\}$  composite film to 0.05 mM DA in 30 days in 0.2 M PBS (pH 7.0).
